# Supplementary material for: Multiple receptor tyrosine kinases regulate dengue infection of hepatocytes
Source: Frontiers journal article supplement (doi:10.3389/fcimb.2024.1264525), 2024-03-22
Supplement: Data_Sheet_2.PDF [file Data_Sheet_2.PDF]

## Supplementary Information

### **Supplementary Figure 1 Flow gating strategy for DENV infection in HepG2 cells**

DENV infection is quantified by gating for cells by size (FSC-A x SSC-A) then measuring the percent of cells staining positive for DENV envelope (Env) protein or non-structural protein 3 (NS3).

### **Supplementary Figure 2 Difference in total RTK expression in DENV-infected cells across biological replicates with varying infection rates**

The fold change in total RTK expression between bystander and infected cells is shown against the average infection rate for each experiment for Env (A) and NS3 (B). Dashed line denotes fold change = 1 to draw attention to the difference in scale for fold change across the RTKs.

### **Supplementary Figure 3 Difference in surface RTK expression in DENV-infected cells across biological replicates with varying infection rates**

The fold change in surface RTK expression between bystander and infected cells is shown against the average infection rate for each experiment for Env (A) and NS3 (B). Dashed line denotes fold change = 1 to draw attention to the difference in scale for fold change across the RTKs.

### **Supplementary Figure 4 Effect of RTK knockdown on Env+ or NS3+ cells**

Knockdown of EPHB4, ERBB2, FGFR2, and IGF1R results in decreased DENV infection. HepG2 cells were transduced with shRNA lentivirus targeting KiR-predicted RTKs then analyzed for protein reduction by western blot (A-B). Viable cells with successful knockdown in protein expression were infected with DENV2 MON601, and the percent change of Env+ (A) and NS3+ (B) cells is shown. Data represent three independent infections on a single transduction per clone. Significance of differences in infection between knockdown lines and scramble were analyzed by Student's t-test and are indicated on the graph, where ns = non-significant, \* = p-value<0.05, \*\* = p-value<0.05, and \*\*\* = p-value<0.0005.

### **Supplementary Figure 5 Temporal phosphorylation response to DENV infection**

HepG2 cells were infected with DENV2 then harvested at the indicated time-point to quantify infection by flow cytometry (in parallel with p-ERBB2 and -IGF1R analysis [Figure 5]). Cells were fixed, permeabilized, blocked then stained with anti-Env-488. Percent of Env+ cells for two independent experiments are shown (A-B).

### **Supplementary Tables**

**Supplementary Table 1** lists the kinase inhibitors used in the KiR screen with corresponding CAS number. All inhibitors were used at 500 nM.

| <b>Supplementary Table 1 Kinase Regression Inhibitor Panel</b> |              |
|----------------------------------------------------------------|--------------|
| <i>Inhibitor ID</i>                                            | <i>CAS #</i> |

|                                              |             |
|----------------------------------------------|-------------|
| Aminopurvanolol A                            | 220792-57-4 |
| AMPK Inhibitor; Compound C<br>(Dorsomorphin) | 866405-64-3 |
| Bosutinib                                    | 380843-75-4 |
| Casein kinase I inhibitor D4476              | 301836-43-1 |
| Cdk1/2 Inhibitor III                         | 443798-55-8 |
| CDK2 inhibitor IV; NU6140                    | 444723-13-1 |
| CDK4 inhibitor                               | 546102-60-7 |
| Dasatinib                                    | 302962-49-8 |
| Dovitinib                                    | 405169-16-6 |
| EGFR/ErbB2/ErbB4 inhibitor                   | 881001-19-0 |
| Erlotinib                                    | 183321-74-6 |
| Gefitinib                                    | 184475-35-2 |
| Go 6976                                      | 136194-77-9 |
| Go 6983                                      | 133053-19-7 |
| GSK inhibitor IX (BIO)                       | 667463-62-9 |
| GSK-3 Inhibitor X                            | 740841-15-0 |
| GSK-3 Inhibitor XIII                         | 404828-08-6 |
| GSK-3b inhibitor I (TDZD-6)                  | 327036-89-5 |
| H89                                          | 130964-39-5 |
| Imatinib                                     | 152459-95-5 |
| JAK inhibitor I                              | 457081-03-7 |
| JNK inhibitor II (SP600125)                  | 129-56-6    |

|                          |             |
|--------------------------|-------------|
| K252a                    | 99533-80-9  |
| Lapatinib                | 388082-78-8 |
| Lck inhibitor            | 213743-31-8 |
| Masitinib                | 790299-79-5 |
| Nilotinib                | 641571-10-0 |
| PKR inhibitor            | 608512-97-6 |
| ROCK inhibitor (Y-27632) | 129830-38-2 |
| SB218078                 | 135897-06-2 |
| Sorafenib                | 284461-73-0 |
| Staurosporine            | 62996-74-1  |
| Staurosporine n benzoyl  | 120685-11-2 |
| SU11274                  | 658084-23-2 |
| SU6656                   | 330161-87-0 |
| Tofacitinib              | 477600-75-2 |
| TWS119                   | 601514-19-6 |
| Vandetanib               | 443913-73-3 |

**Supplementary Table 2** lists the kinases predicted by KiR on dengue infection in hepatocytes with the corresponding coefficient of correlation at  $\alpha = 0.8$ . Positive coefficient of correlation indicates the kinase is predicted to promote DENV infection, negative coefficient of correlation indicates the kinase is predicted to restrict DENV infection.

| <b>Supplementary Table 2 KiR-predicted Kinases Regulating DENV Infection</b> |                                   |
|------------------------------------------------------------------------------|-----------------------------------|
| <i>Predicted Kinase</i>                                                      | <i>Coefficient of Correlation</i> |
| ACK1                                                                         | -0.04048                          |
| CHK1                                                                         | -0.02247                          |
| CK1g3                                                                        | -0.05048                          |
| CTK_MATK                                                                     | -0.00949                          |
| DYRK4                                                                        | 0.294582                          |
| EPHA4                                                                        | 0.020529                          |
| EPHB3                                                                        | 0.020855                          |
| EPHB4                                                                        | 0.009052                          |
| ERBB2/HER2                                                                   | 0.076245                          |
| ERK1                                                                         | -0.129                            |
| FGFR2                                                                        | -0.0591                           |
| HIPK1                                                                        | -0.06499                          |
| IGF1R                                                                        | 0.294032                          |
| IKKa/CHUK                                                                    | 0.251537                          |
| JAK3                                                                         | 0.07556                           |
| KHS_MAP4K5                                                                   | 0.048963                          |
| LKB1                                                                         | -0.01933                          |
| MAPKAPK5/PRAK                                                                | 0.171559                          |
| MARK1                                                                        | 0.00079                           |
| MARK4                                                                        | 0.022757                          |
| NEK11                                                                        | 0.036702                          |

|             |          |
|-------------|----------|
| NEK3        | -0.03688 |
| NIK/MAP3K14 | 0.013453 |
| P38b/MAPK11 | 0.014872 |
| P38d/MAPK13 | -0.02163 |
| PAK1        | 0.178078 |
| PAK4        | -0.0126  |
| PAK5        | -0.00049 |
| PIM3        | 0.066172 |
| PKCepsilon  | -0.01607 |
| PKG1a       | 0.039417 |
| RET         | -0.03284 |
| ROCK1       | -0.00073 |
| SIK2        | 0.10975  |
| SRPK1       | 0.016612 |
| TTK         | -0.01278 |

**Supplementary Table 3** details the shRNA constructs used to generate kinase knockdown cells. Scrambled control was obtained from Sigma-Aldrich® (# SCH002).

| <b>Supplementary Table 3 MISSION shRNA Constructs</b> |           |        |      |       |             |            |           |
|-------------------------------------------------------|-----------|--------|------|-------|-------------|------------|-----------|
| Clone                                                 |           | RefSeq | Gene | Taxon | Gene        |            | Validated |
| ID                                                    | Oligo Seq | ID     | ID   | ID    | Description | Validated? | Cell Line |

|                        |                                                                                           |                 |      |      |                       |     |      |
|------------------------|-------------------------------------------------------------------------------------------|-----------------|------|------|-----------------------|-----|------|
| TRCN<br>00000<br>10165 | CCGGTCA<br>GTCCGTG<br>TGTTCTA<br>TAAACTC<br>GAGTTTA<br>TAGAACA<br>CACGGAC<br>TGATTTT<br>T | NM_00<br>4438.3 | 2043 | 9606 | EPH<br>receptor<br>A4 | Yes | A549 |
| TRCN<br>00000<br>06427 | CCGGCC<br>CAAACCT<br>CTTCATA<br>TTGAACT<br>CGAGTTC<br>AATATGA<br>AGAGGTT<br>TGGGTTT<br>TT | NM_00<br>4443.3 | 2049 | 9606 | EPH<br>receptor<br>B3 | Yes | MCF7 |
| TRCN<br>00000<br>06428 | CCGGGC<br>AGTACAT<br>TGCTCCT<br>GGAATCT<br>CGAGATT                                        | NM_00<br>4443.3 | 2049 | 9606 | EPH<br>receptor<br>B3 | Yes | MCF7 |

|                        |                                                                                       |                           |      |      |                                |     |      |
|------------------------|---------------------------------------------------------------------------------------|---------------------------|------|------|--------------------------------|-----|------|
|                        | CCAGGA<br>GCAATGT<br>ACTGCTT<br>TTT                                                   |                           |      |      |                                |     |      |
| TRCN<br>00000<br>01773 | CCGGCAA<br>TGGGAGA<br>GAAGCAG<br>AATACTC<br>GAGTATT<br>CTGCTTC<br>TCTCCCA<br>TTGTTTTT | NM_00<br>4444.4           | 2050 | 9606 | EPH<br>receptor<br>B4          | Yes | A549 |
| TRCN<br>00000<br>01774 | CCGGTGA<br>TCTGAAG<br>TGGGTGA<br>CATTCTC<br>GAGAATG<br>TCACCCA<br>CTTCAGA<br>TCATTTTT | NM_00<br>4444.4           | 2050 | 9606 | EPH<br>receptor<br>B4          | Yes | A549 |
| TRCN<br>00000<br>39878 | CCGGTGT<br>CAGTATC<br>CAGGCTT                                                         | NM_00<br>100586<br>2.1,NM | 2064 | 9606 | v-erb-b2<br>erythroblas<br>tic | Yes | A549 |



|                        |                                                                                            |                                            |      |      |                                                                                                                                                      |     |      |
|------------------------|--------------------------------------------------------------------------------------------|--------------------------------------------|------|------|------------------------------------------------------------------------------------------------------------------------------------------------------|-----|------|
|                        | TGTACTC<br>GAGTACA<br>AAGCCTG<br>GATACTG<br>ACATTTT<br>TG                                  | _00444<br>8.2                              |      |      | leukemia<br>viral<br>oncogene<br>homolog 2,<br>neuro/gliob<br>lastoma<br>derived<br>oncogene<br>homolog<br>(avian)                                   |     |      |
| TRCN<br>00000<br>39881 | CCGGCA<br>GTGCCAA<br>TATCCAG<br>GAGTTCT<br>CGAGAAC<br>TCCTGGA<br>TATTGGC<br>ACTGTTT<br>TTG | NM_00<br>100586<br>2.1,NM<br>_00444<br>8.2 | 2064 | 9606 | v-erb-b2<br>erythroblas<br>tic<br>leukemia<br>viral<br>oncogene<br>homolog 2,<br>neuro/gliob<br>lastoma<br>derived<br>oncogene<br>homolog<br>(avian) | Yes | A549 |



|                        |                                                                                           |                                                                                                                                                                        |      |      |                                              |  |  |
|------------------------|-------------------------------------------------------------------------------------------|------------------------------------------------------------------------------------------------------------------------------------------------------------------------|------|------|----------------------------------------------|--|--|
|                        | TGGTTGG<br>TGGCTTT<br>TT                                                                  | 4914.1,<br>NM_00<br>114491<br>7.1,NM<br>_02297<br>0.3                                                                                                                  |      |      |                                              |  |  |
| TRCN<br>00000<br>00368 | CCGGCC<br>GAATGAA<br>GAACACG<br>ACCAACT<br>CGAGTTG<br>GTCGTGT<br>TCTTCAT<br>TCGGTTT<br>TT | NM_00<br>0141.4,<br>NM_00<br>114491<br>3.1,NM<br>_00114<br>4914.1,<br>NM_00<br>114491<br>5.1,NM<br>_00114<br>4916.1,<br>NM_00<br>114491<br>8.1,NM<br>_00114<br>4919.1, | 2263 | 9606 | fibroblast<br>growth<br>factor<br>receptor 2 |  |  |

|                        |                                                                                           |                  |      |      |                                                |     |      |
|------------------------|-------------------------------------------------------------------------------------------|------------------|------|------|------------------------------------------------|-----|------|
|                        |                                                                                           | NM_02<br>2970.3  |      |      |                                                |     |      |
| TRCN<br>00000<br>00424 | CCGGGC<br>TGATGTG<br>TACGTTC<br>CTGATCT<br>CGAGATC<br>AGGAACG<br>TACACAT<br>CAGCTTT<br>TT | NM_00<br>0875.3  | 3480 | 9606 | insulin-like<br>growth<br>factor 1<br>receptor | Yes | A549 |
| TRCN<br>00000<br>00425 | CCGGCCT<br>TGGACGT<br>TCTTTCA<br>GCATCTC<br>GAGATGC<br>TGAAAGA<br>ACGTCCA<br>AGGTTTT<br>T | NM_00<br>0875.3  | 3480 | 9606 | insulin-like<br>growth<br>factor 1<br>receptor | Yes | A549 |
| TRCN<br>00000<br>00404 | CCGGCC<br>GCTGGTG<br>GACTGTA                                                              | NM_02<br>0630.4, | 5979 | 9606 | ret proto-<br>oncogene                         | Yes | MCF7 |

|                        |                                                                                           |                                     |      |      |                        |     |      |
|------------------------|-------------------------------------------------------------------------------------------|-------------------------------------|------|------|------------------------|-----|------|
|                        | ATAATCT<br>CGAGATT<br>ATTACAG<br>TCCACCA<br>GCGGTTT<br>TT                                 | NM_02<br>0975.4                     |      |      |                        |     |      |
| TRCN<br>00000<br>00405 | CCGGGC<br>TGCATGA<br>GAACAAC<br>TGGATCT<br>CGAGATC<br>CAGTTGT<br>TCTCATG<br>CAGCTTT<br>TT | NM_02<br>0630.4,<br>NM_02<br>0975.4 | 5979 | 9606 | ret proto-<br>oncogene | Yes | MCF7 |

#### Supplementary Files

**Supplementary File 1** “KinaseRegression.ipynb” includes the code used to run KiR on DENV infection.

**Supplementary File 2** “Figure1B-C\_KinasePrediction\_alpharange.txt” includes the KiR output for DENV infection across the range of alphas.

**Supplementary File 3** “Figure1D.txt” includes the L2 phosphosignaling network from KiR input into Cytoscape to generate Figure 1D.

**Supplementary File 4** “Figure1B\_raw.xlsx” includes the raw data used to graph Figure 1B.

**Supplementary File 5** “Figure 5\_raw.xlsx” includes the raw data used to graph Figure 5C-D.
